# Supplementary material
Source: PubMed Central journal article supplement (PMC10425846)
Supplement: EMBJ-42-e110757-s002.pdf [file EMBJ-42-e110757-s002.pdf]

# Appendix PDF

|                          |   |
|--------------------------|---|
| APPENDIX FIGURE S1 ..... | 2 |
| APPENDIX FIGURE S2 ..... | 3 |
| APPENDIX FIGURE S3 ..... | 4 |

# Appendix Figure S1

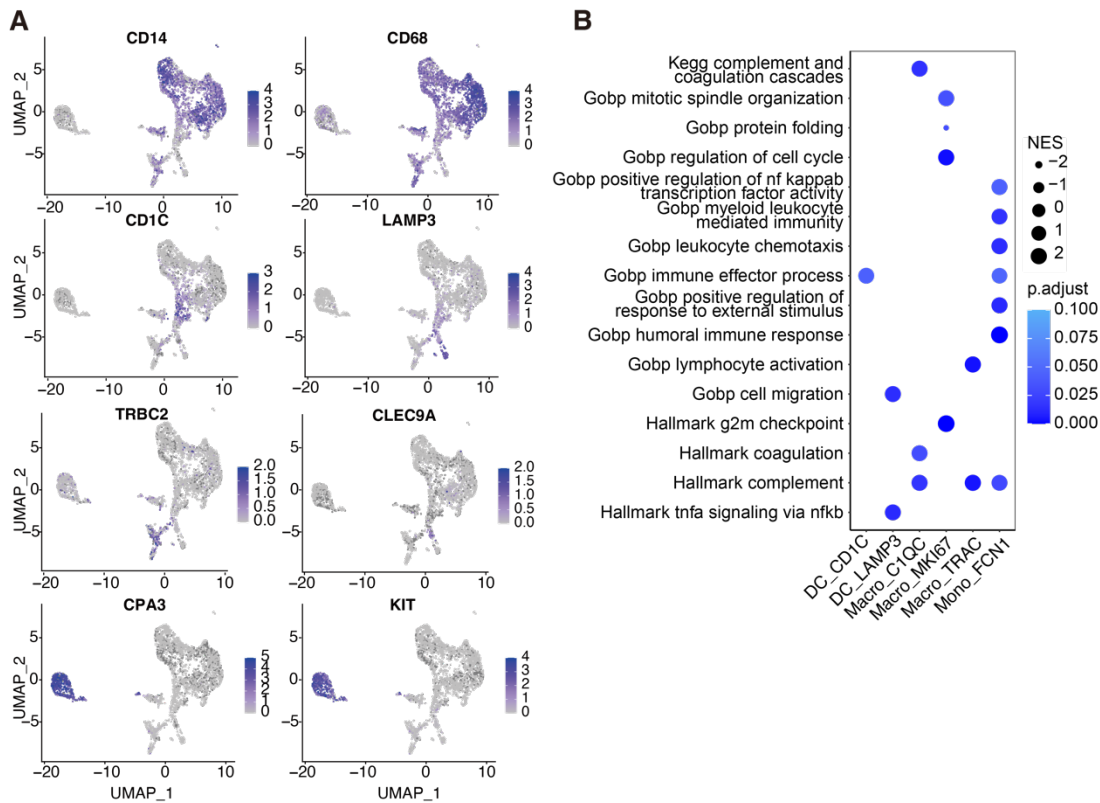

## Appendix Figure S1. Additional analysis of myeloid cells

**A** UMAP plot showing the expression distribution of marker genes in myeloid cells;  
**B** Dot plot showing the selected signaling pathways (rows) with significant enrichment of GO, KEGG, and Hallmark terms for myeloid cell clusters.  
(related to Figure 5)

# Appendix Figure S2

## Novel Findings of Tumor Microenvironment in Cervical Cancer

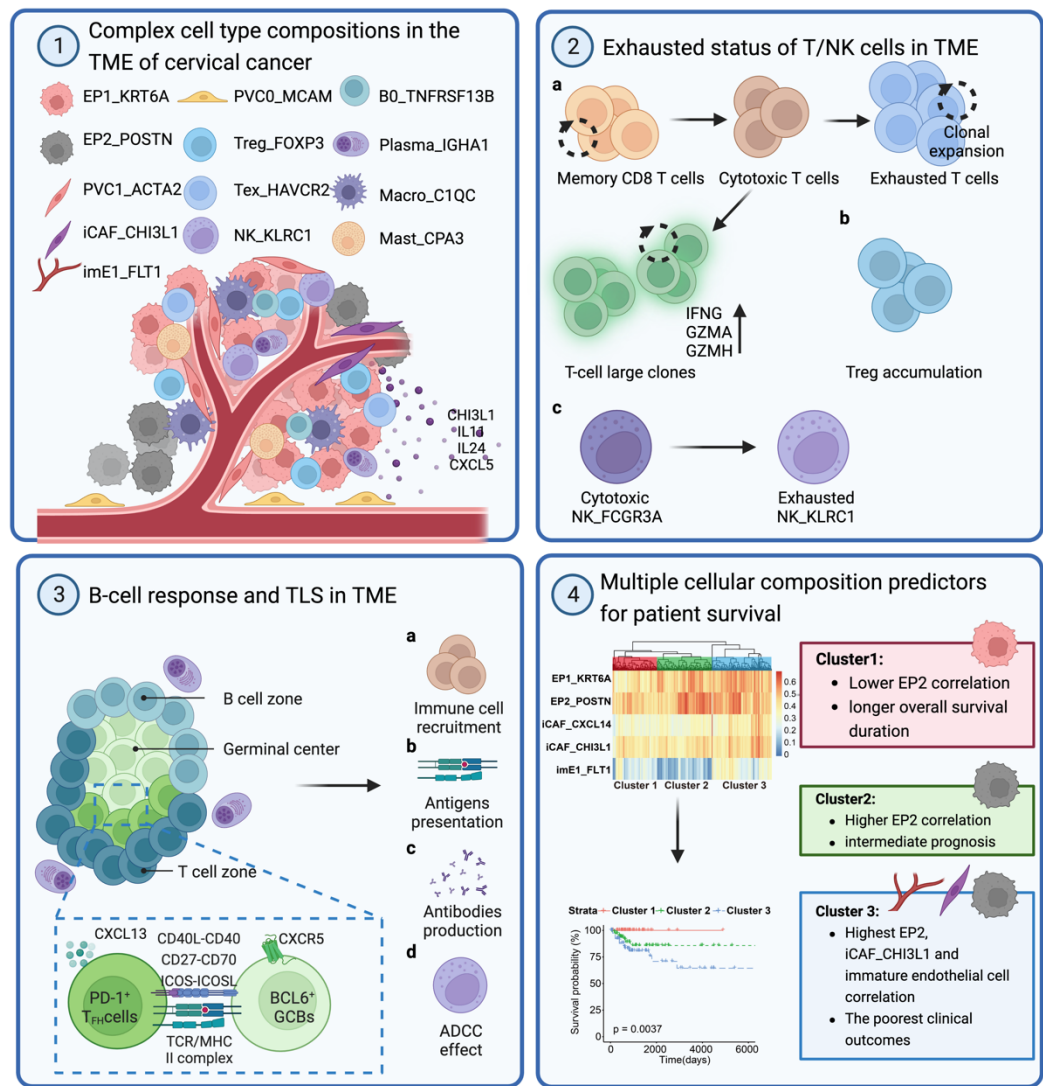

Appendix Figure S2. Schematic diagram of novel findings in the TME of CC.

Created with BioRender.com.

## Appendix Figure S3

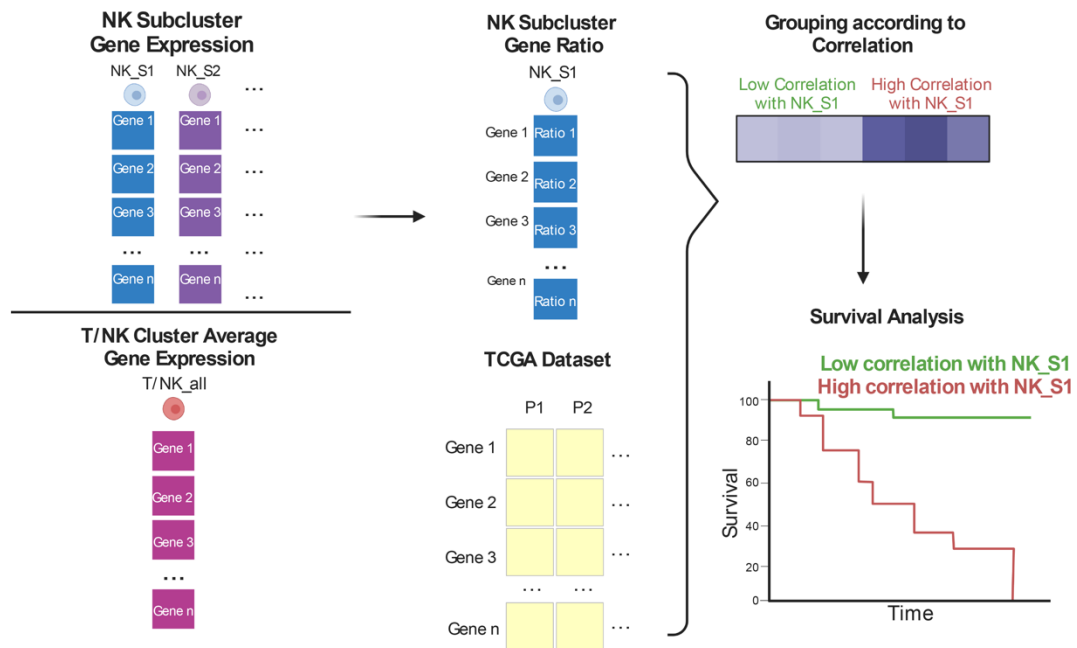

**Appendix Figure S3. Schematic diagram of survival analysis with the NK subset as an example.** Created with BioRender.com.

For example, for each cell type subset, such as NK\_FCGR3A , we generated the averaged gene expression for all of the genes for that subset; for each gene, we divided the gene expression by the corresponding averaged gene expression of all T and NK cells, which generated a list of ratios for all genes. These ratios represented the specificity of each gene for the NK\_FCGR3A cell subset. Then, for each patient in the TCGA cohort (TCGA, CESC-squamous cell neoplasms), we calculated the overlapping genes between all TCGA patient genes and NK\_FCGR3A signature genes and the Spearman correlation using the expression of overlapped genes from that patient with ratios of overlapped genes from scRNA-seq data. Patients will be classified into a higher correlation group and a lower correlation group by 55th and 45th quantile values, for which higher correlation indicates that the patient might have higher infiltration of NK\_FCGR3A, and lower correlation, and vice versa.
